# Supplementary material for: Absence of electron-transfer-associated changes in the time-dependent X-ray free-electron laser structures of the photosynthetic reaction center
Source: eLife journal article supplement (doi:10.7554/elife.88955), 2023-07-14
Supplement: fig2-figsupp1-data1 [file Figure 2-figure supplement 1-source data 1.xlsx]

## Sheet: Sheet1
		Em	LUMO
	PLPM	-846	-3580
	BL	-848	-3560
	BM	-904	-3490
	HL	-561	-5230
	HM	-607	-5120
